# Supplementary material for: Relevance of near-surface soil moisture vs. terrestrial water storage for global vegetation functioning
Source: Copernicus journal article supplement (doi:10.5194/egusphere-2023-770), 2023-05-08
Supplement: Supplementary file [file egusphere-2023-770-AC2-supplement.pdf]

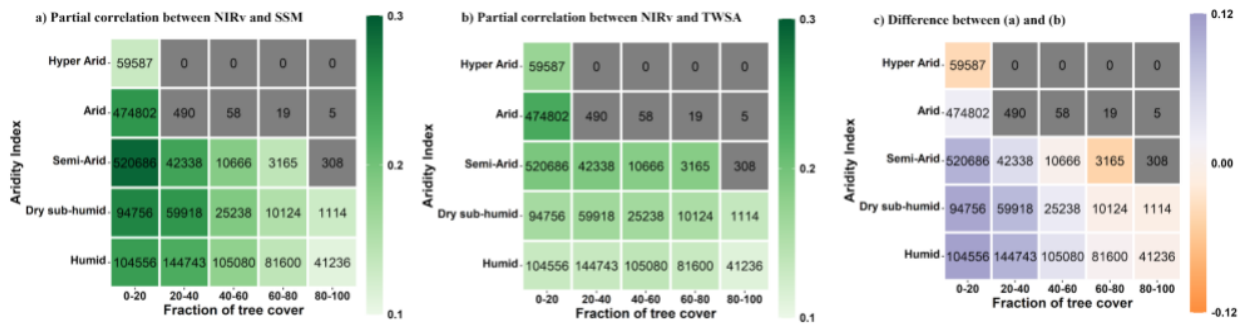

Figure R1: Summarising the coupling strengths of vegetation functioning (NIRv) with (a) near-surface soil moisture (SSM) and (b) terrestrial water storage (TWS) in the growing season-months across climate (aridity index) and vegetation regimes (fraction of tree cover). The only difference with Figure 3 is the different formulation of AI used in this figure.

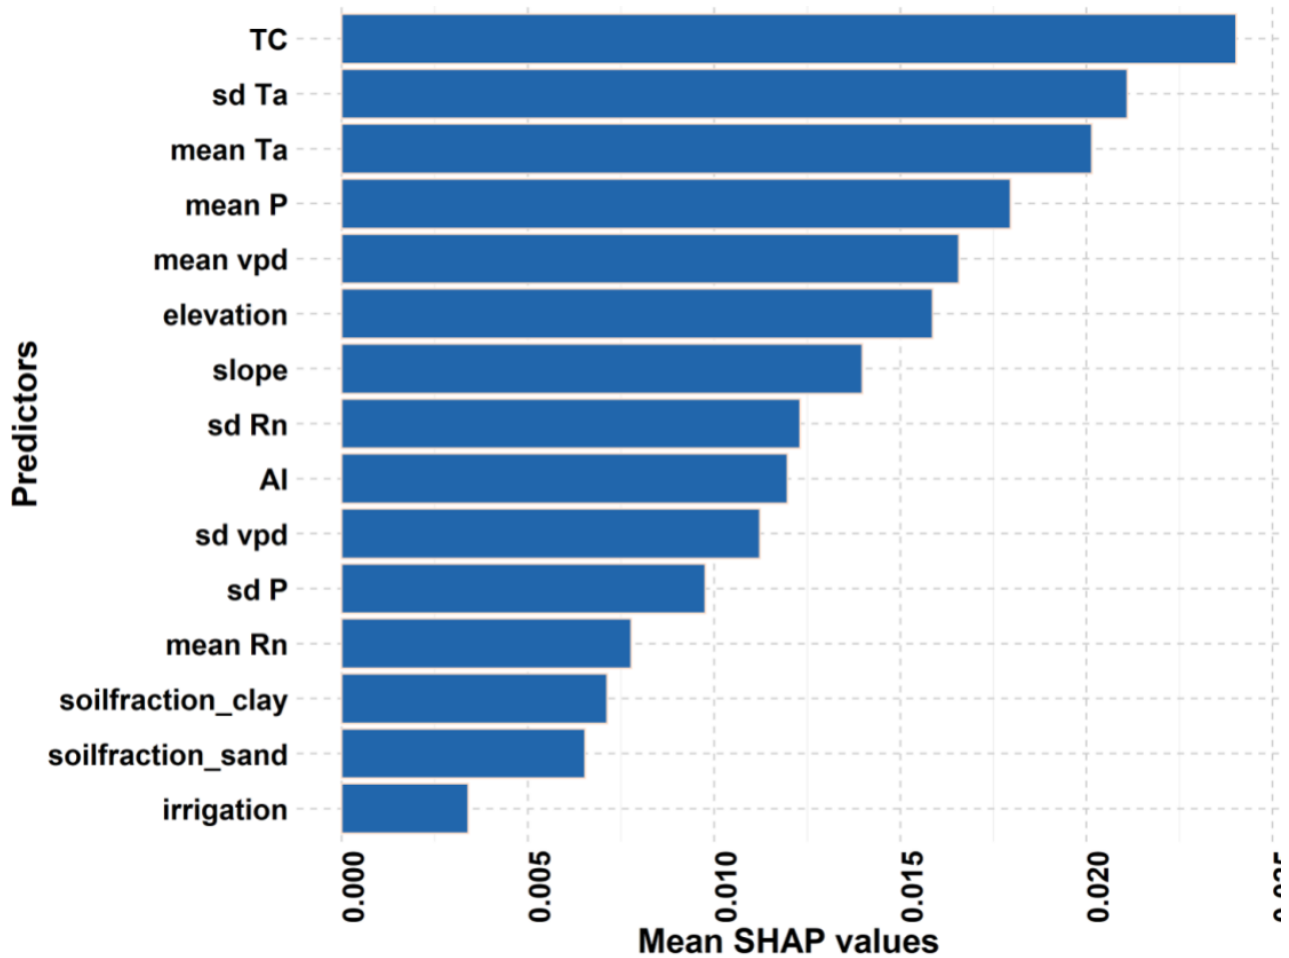

Figure R2: Global feature importance based on the mean absolute magnitude of the SHAP values (including vpd).

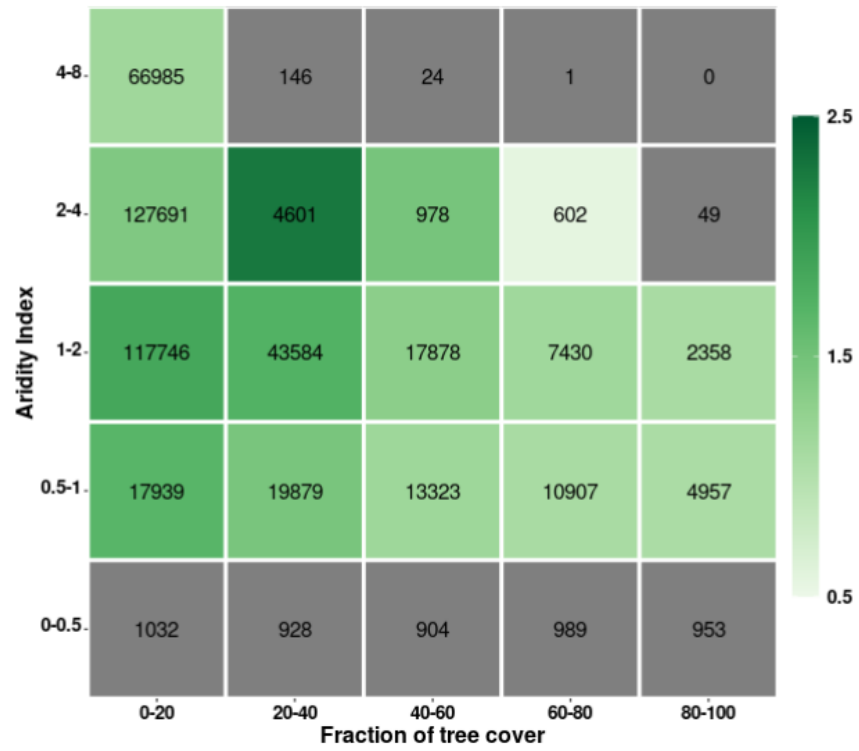

Figure R3: Summarizing the ratio of  $r(\text{NIRv} \sim \text{TWS}_{\text{dry}}) - r(\text{NIRv} \sim \text{TWS}_{\text{growing}})$  to  $r(\text{NIRv} \sim \text{SSM}_{\text{dry}}) - r(\text{NIRv} \sim \text{SSM}_{\text{growing}})$  across aridity-tree cover classes.
